# Supplementary material
Source: MDPI journal article supplement (https://www.mdpi.com/2413-8851/7/4/105)
Supplement: s1 [file s1]

## Supplementary Material

**Table S1 Rail Station Types and Its Predominate Land Uses in Percentage**

| Type              | Rail Station (Percentage of Predominate Land Uses)                                                                                                                                                                                                                         |                                                                                                                                                                                                                                                           |
|-------------------|----------------------------------------------------------------------------------------------------------------------------------------------------------------------------------------------------------------------------------------------------------------------------|-----------------------------------------------------------------------------------------------------------------------------------------------------------------------------------------------------------------------------------------------------------|
| Residential (70%) | Avondale(23.12%),<br>Baldwin Ave(18.75%),<br>Ellerslie(31.48%),<br>Fruitvale Rd(40.74%),<br>Glen Eden(25.29%),<br>Greenlane(20.02%),<br>Henderson(23.07%),<br>Kingsland(28.90%),<br>Manurewa(26.98%),<br>Middlemore(24.35%),<br>Morningside(19.32%),<br>Mt Albert(26.02%), | New Lynn(18.99%),<br>Newmarket(18.75%),<br>Onehunga(21.97%),<br>Papakura(34.81%),<br>Papatoetoe(41.55%),<br>Puhinui(25.23%),<br>Ranui(25.98%),<br>Remuera(17.85%),<br>Sturges Rd(21.27%),<br>Sunnyvale(26.69%),<br>Takaanini(33.09%),<br>Te Mahia(35.08%) |
| Business (15%)    | Britomart (40.02%),<br>Grafton (17.57%),<br>Manukau (20.71%),                                                                                                                                                                                                              | Parnell (19.82%),<br>The Strand (26.35%)                                                                                                                                                                                                                  |
| Industrial (12%)  | Homai (23.8%),<br>Otahuhu (21.84%),                                                                                                                                                                                                                                        | Penrose (31.63%),<br>Te Papapa (29.44%)                                                                                                                                                                                                                   |
| Rural (3%)        | Swanson (28.70%)                                                                                                                                                                                                                                                           |                                                                                                                                                                                                                                                           |
